# Supplementary material for: Li-argyrodite solid-state electrolytes with lithium compatibility and air stability for all-solid-state batteries
Source: Royal Society of Chemistry journal article supplement (doi:10.1039/d3ta07453f), 2024-01-01
Supplement: d3ta07453f1.pdf [file d3ta07453f1.pdf]

## Supporting Information

### One Arrow, Two Eagles: Li-Argyrodite Solid-State Electrolytes with Lithium Compatibility and Air Stability for All-Solid-State Batteries

Daoxi Wang<sup>a</sup>, Haiting Shi<sup>a</sup>, Wenhui Cui<sup>a</sup>, Hao Li<sup>b</sup>, Jiarong Niu<sup>a</sup>, Shuo Wang<sup>a</sup>, Zhiwei Xu<sup>\*a</sup>

<sup>a</sup> State Key Laboratory of Separation Membranes and Membrane Processes, School of Textile Science and Engineering, Tiangong University, Tianjin 300387, China

<sup>b</sup> Key Laboratory of Neutron Physics, Institute of Nuclear Physics and Chemistry, China Academy of Engineering Physics, Mianyang 621999, China

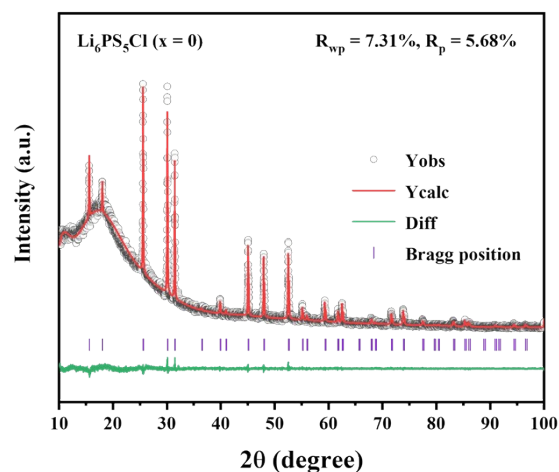

Fig. S1 XRD Rietveld refinement results of  $\text{Li}_6\text{PS}_5\text{Cl}$  electrolyte powder at room temperature.

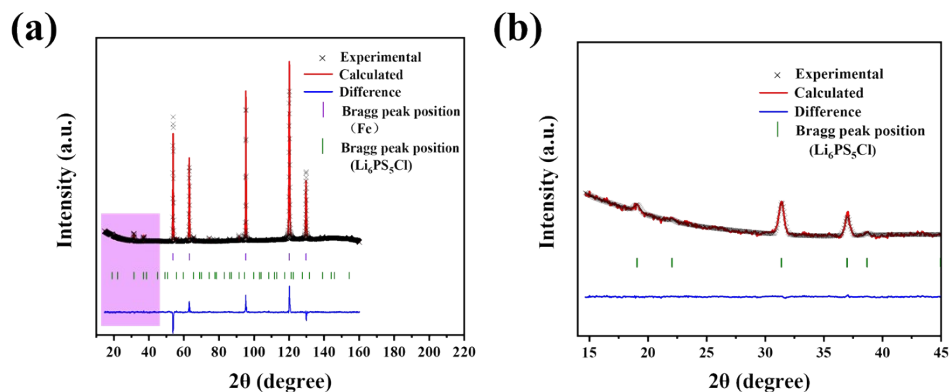

Fig. S2 (a) Rietveld refined ND pattern for the  $\text{Li}_6\text{PS}_5\text{Cl}$ ; (b) Rietveld refined ND ( $\text{Li}_6\text{PS}_5\text{Cl}$ )

\* Corresponding author. E-mail address: [xuzhiwei@tiangong.edu.cn](mailto:xuzhiwei@tiangong.edu.cn) (Zhiwei Xu)

magnification from 15° to 45°.

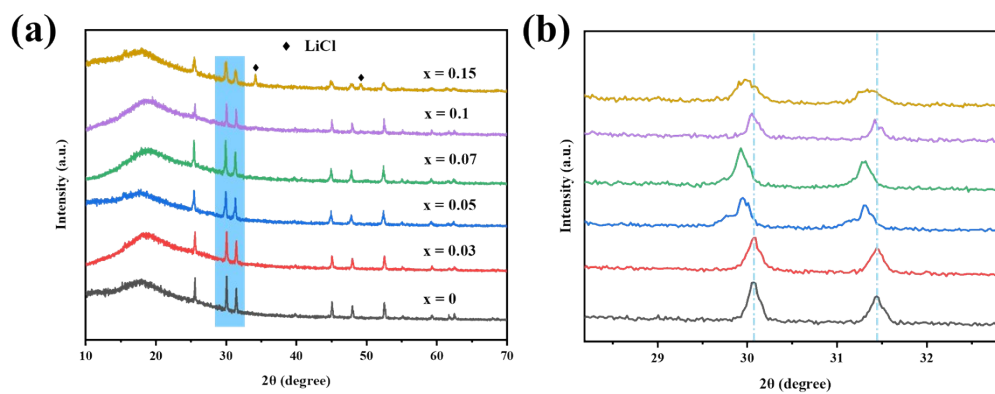

**Fig. S3** Zr-substituted Li sites: (a) XRD patterns of  $\text{Li}_{6-4x}\text{Zr}_x\text{PS}_{5-2x}\text{O}_{2x}\text{Cl}$  ( $0 \leq x \leq 0.15$ ) at 10° to 70° and (b) magnified XRD patterns at 27.5° to 33.5°.

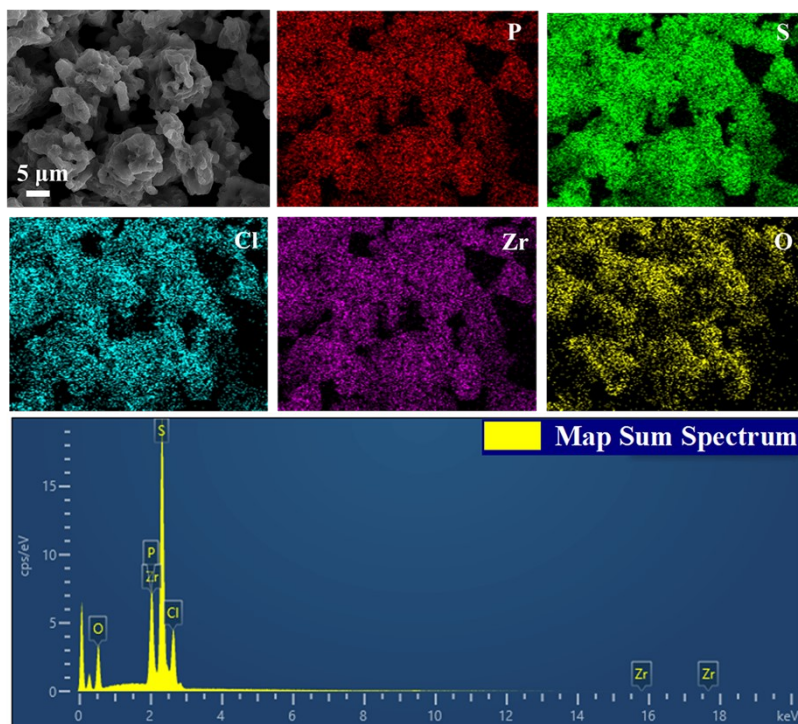

**Fig. S4** SEM and EDS mapping of  $\text{Li}_{6+x}\text{P}_{1-x}\text{Zr}_x\text{S}_{5-2x}\text{O}_{2x}\text{Cl}$  ( $x = 0.01$ ) electrolyte.

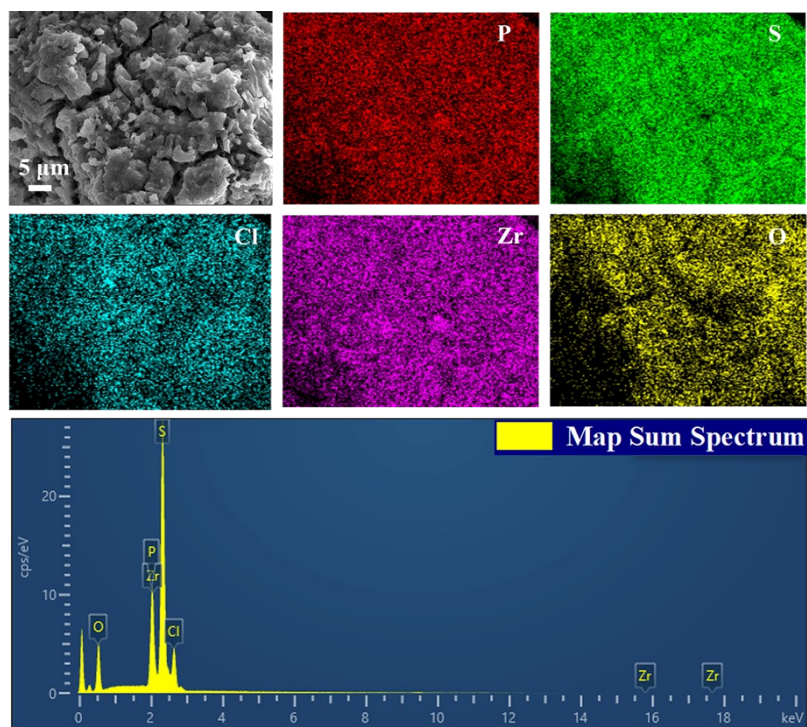

**Fig. S5** SEM and EDS mapping of  $\text{Li}_{6+x}\text{P}_{1-x}\text{Zr}_x\text{S}_{5-2x}\text{O}_{2x}\text{Cl}$  ( $x = 0.03$ ) electrolyte.

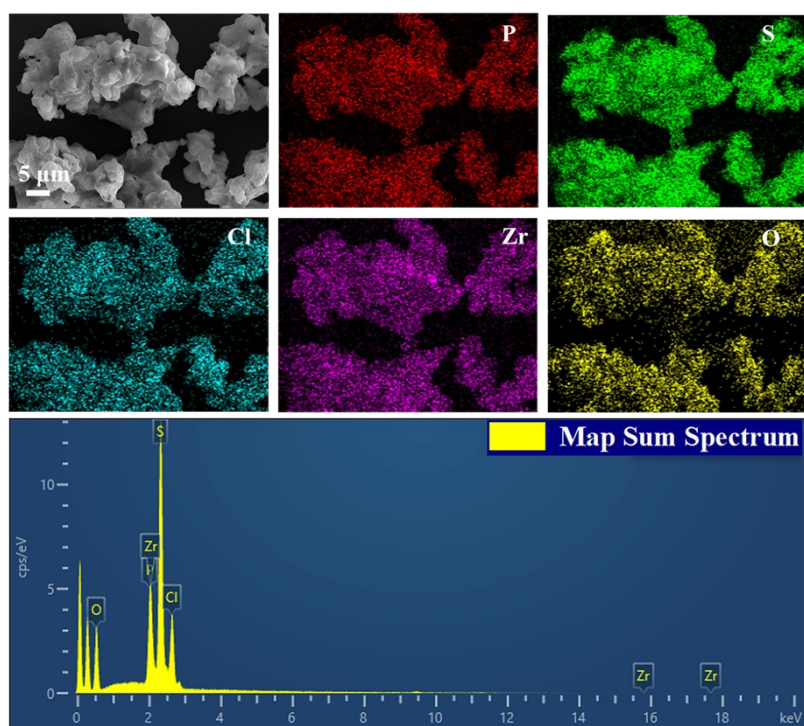

**Fig. S6** SEM and EDS mapping of  $\text{Li}_{6+x}\text{P}_{1-x}\text{Zr}_x\text{S}_{5-2x}\text{O}_{2x}\text{Cl}$  ( $x = 0.07$ ) electrolyte.

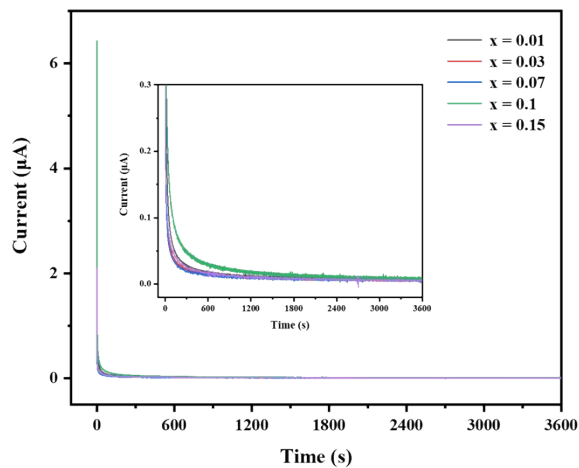

**Fig. S7** DC polarization curves for  $\text{Li}_{6+x}\text{P}_{1-x}\text{Zr}_x\text{S}_{5-2x}\text{O}_{2x}\text{Cl}$  ( $x = 0.01, 0.03, 0.07, 0.1, 0.15$ ) electrolytes.

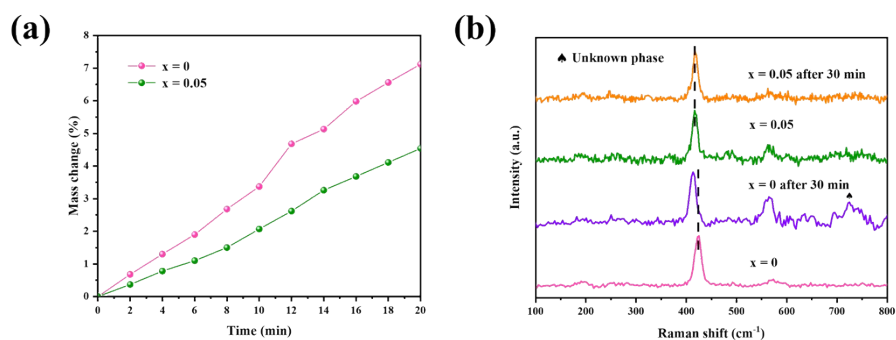

**Fig. S8** (a) Mass changes for SSEs as a function of time after exposure to humid air; (b) Raman spectra of the  $\text{Li}_6\text{PS}_5\text{Cl}$  and  $\text{Li}_{6.05}\text{P}_{0.95}\text{Zr}_{0.05}\text{S}_{4.9}\text{O}_{0.1}\text{Cl}$  electrolytes before and after exposure to humid air.

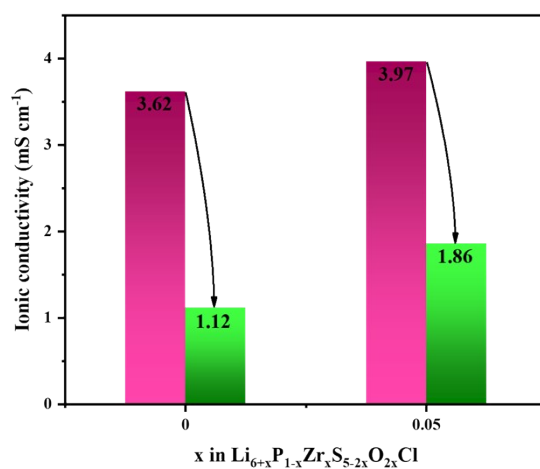

**Fig. S9** Changes in ionic conductivity of  $\text{Li}_{6+x}\text{P}_{1-x}\text{Zr}_x\text{S}_{5-2x}\text{O}_{2x}\text{Cl}$  ( $x = 0, 0.05$ ) electrolytes before and after exposure to air.

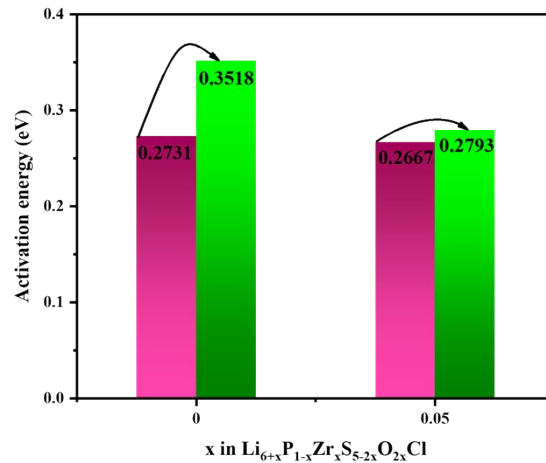

**Fig. S10** Changes in activation energy of  $\text{Li}_{6+x}\text{P}_{1-x}\text{Zr}_x\text{S}_{5-2x}\text{O}_{2x}\text{Cl}$  ( $x = 0, 0.05$ ) electrolytes before and after exposure to air.

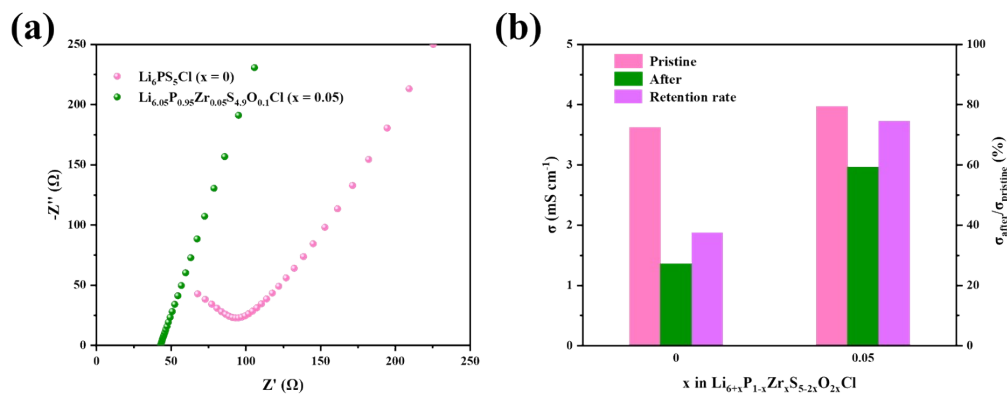

**Fig. S11** (a) EIS of  $\text{Li}_6\text{PS}_5\text{Cl}$  and  $\text{Li}_{6.05}\text{P}_{0.95}\text{Zr}_{0.05}\text{S}_{4.9}\text{O}_{0.1}\text{Cl}$  electrolytes after post-annealing; (b) Ionic conductivity and restoration ratio of  $\text{Li}_6\text{PS}_5\text{Cl}$  and  $\text{Li}_{6.05}\text{P}_{0.95}\text{Zr}_{0.05}\text{S}_{4.9}\text{O}_{0.1}\text{Cl}$  electrolytes after post annealing.

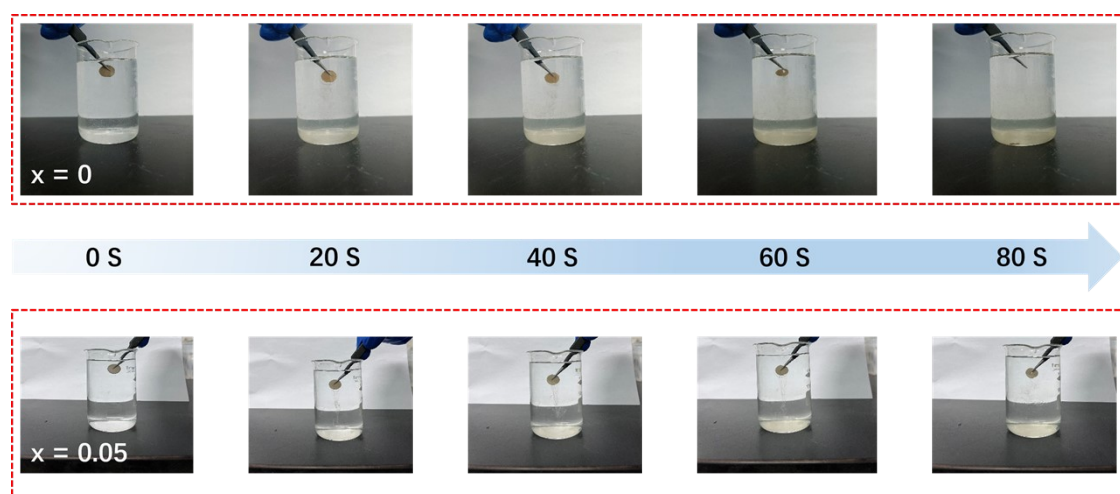

**Fig. S12** Optical photographs of  $\text{Li}_6\text{PS}_5\text{Cl}$  ( $x = 0$ ) and  $\text{Li}_{6.05}\text{P}_{0.95}\text{Zr}_{0.05}\text{S}_{4.9}\text{O}_{0.1}\text{Cl}$  ( $x = 0.05$ ) electrolytes

completely immersed in deionized water at room temperature.

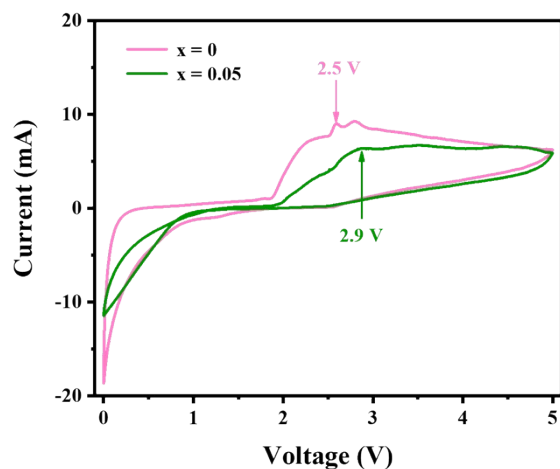

**Fig. S13** CV test of assembled C@Cu/Li<sub>6+x</sub>P<sub>1-x</sub>Zr<sub>x</sub>S<sub>5-2x</sub>O<sub>2x</sub>Cl/Li asymmetric cell (x = 0, 0.05).

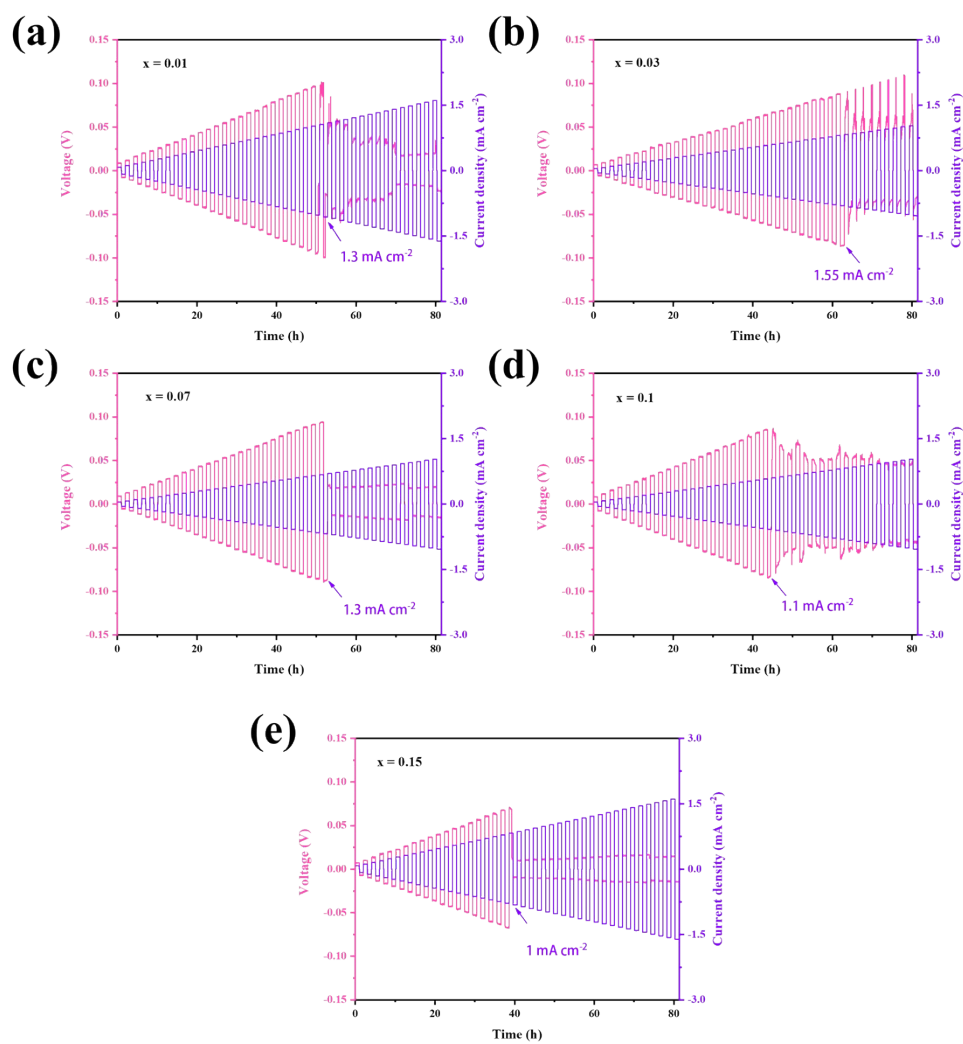

**Fig. S14** Li symmetric cells with different ZrO<sub>2</sub> co-substitution levels were subjected to constant current cycling at 298 K at progressively increasing current densities, where (a) x = 0.01, (b) x =

0.03, (c)  $x = 0.07$ , (d)  $x = 0.1$ , and (e)  $x = 0.15$ .

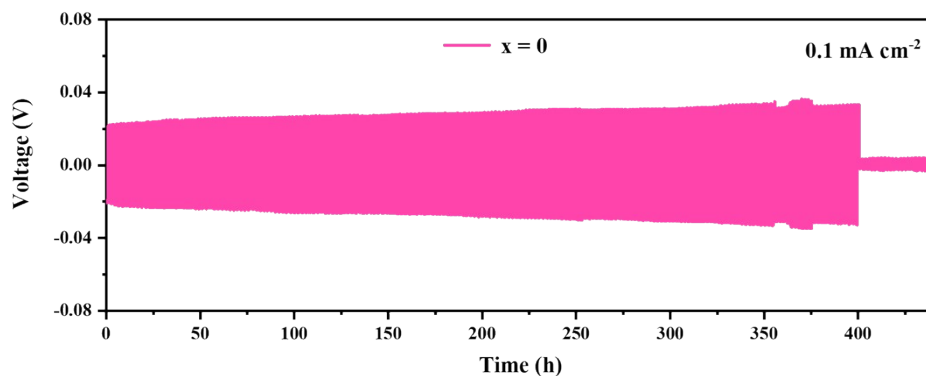

**Fig. S15** Galvanostatic cycling of Li/Li<sub>6</sub>PS<sub>5</sub>Cl/Li symmetric cell at the current density of 0.1 mA cm<sup>-2</sup> for 0.1 mAh cm<sup>-2</sup>.

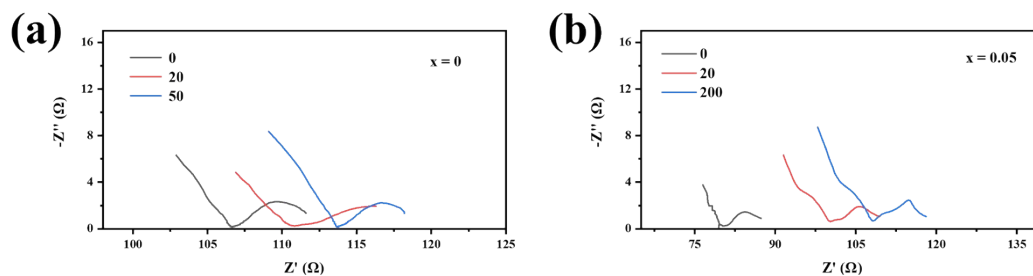

**Fig. S16** The impedance spectral changes of (a) Li/Li<sub>6</sub>PS<sub>5</sub>Cl/Li and (b) Li/Li<sub>6.05</sub>P<sub>0.95</sub>Zr<sub>0.05</sub>S<sub>4.9</sub>O<sub>0.1</sub>Cl/Li symmetric cells after different lithium stripping/plating durations.

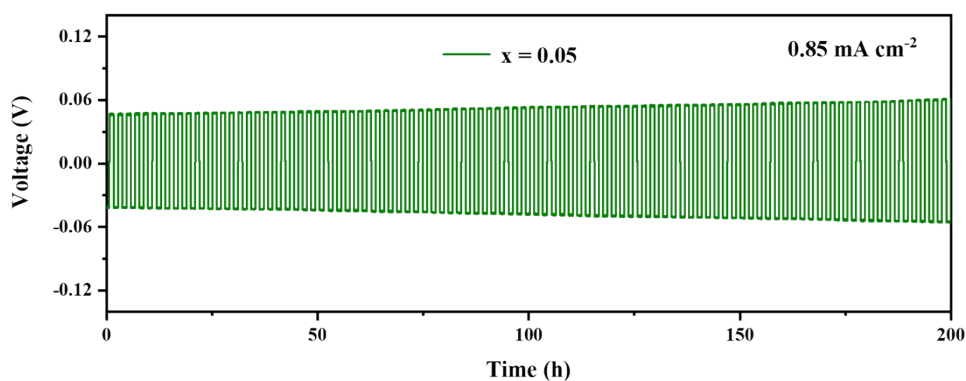

**Fig. S17** Galvanostatic cycling of the Li symmetric cells with Li<sub>6.05</sub>P<sub>0.95</sub>Zr<sub>0.05</sub>S<sub>4.9</sub>O<sub>0.1</sub>Cl electrolyte at 0.85 mA cm<sup>-2</sup>/0.85 mAh cm<sup>-2</sup>.

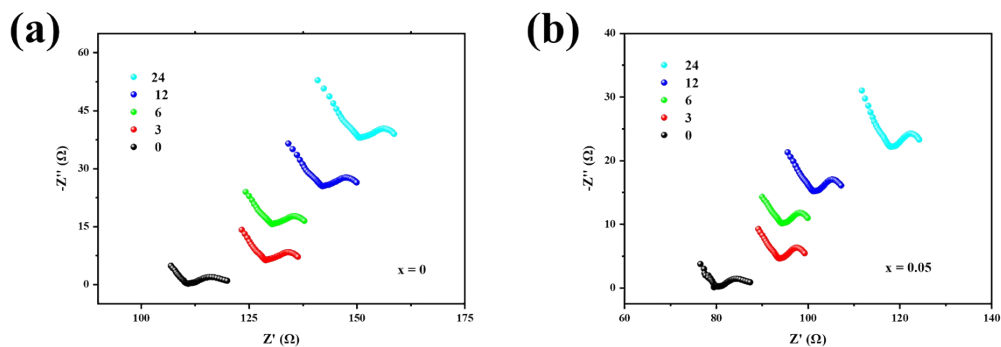

**Fig. S18** Time-dependent EIS spectra of Li symmetric cells with different sulfide electrolytes: (a) pristine  $\text{Li}_6\text{PS}_5\text{Cl}$  ( $x = 0$ ) and (b)  $\text{Li}_{6.05}\text{P}_{0.95}\text{Zr}_{0.05}\text{S}_{4.9}\text{O}_{0.1}\text{Cl}$  ( $x = 0.05$ ) electrolytes.

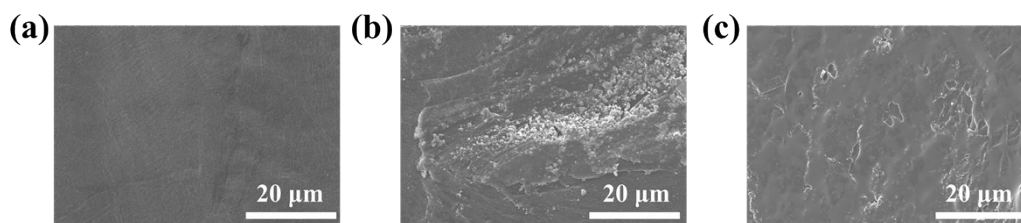

**Fig. S19** (a) SEM images of pristine Li metal surface. SEM images of Li surface after cycling with (b)  $\text{Li}_6\text{PS}_5\text{Cl}$  electrolyte and (c) pristine  $\text{Li}_{6.05}\text{P}_{0.95}\text{Zr}_{0.05}\text{S}_{4.9}\text{O}_{0.1}\text{Cl}$  electrolyte, respectively.

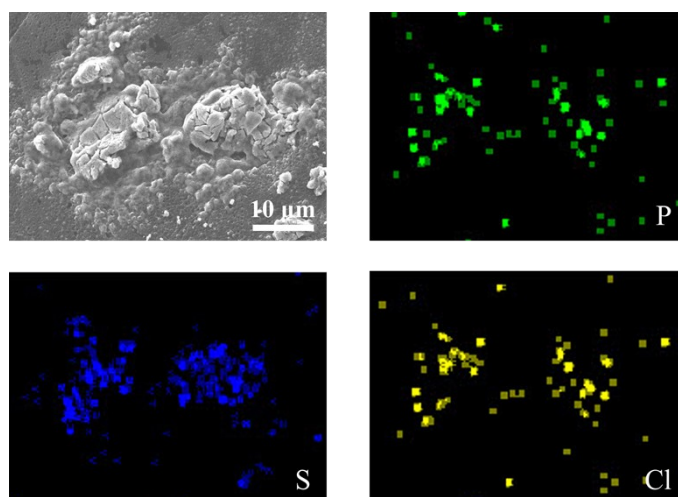

**Fig. S20** The corresponding EDS mapping of Li surface after cycling with pristine  $\text{Li}_6\text{PS}_5\text{Cl}$  electrolyte.



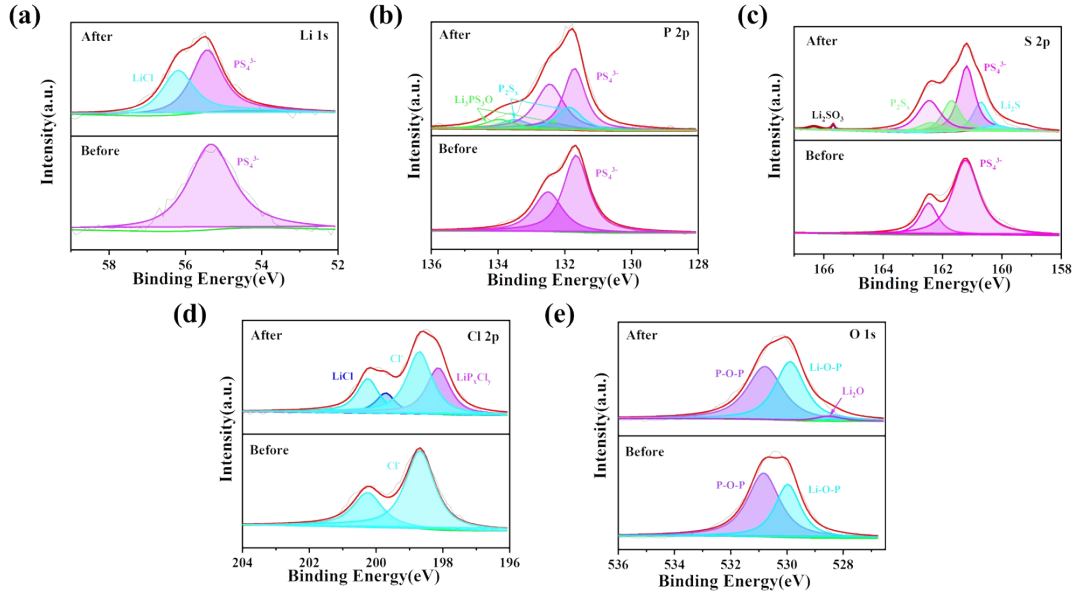

**Fig. S21** (a) XPS deconvolution spectra of Li 1s, (b) P 2p, (c) S 2p, (d) Cl 2p and (e) O 1s region of fresh and after cycling Li/Li<sub>6.05</sub>P<sub>0.95</sub>Zr<sub>0.05</sub>S<sub>4.9</sub>O<sub>0.1</sub>Cl interface.

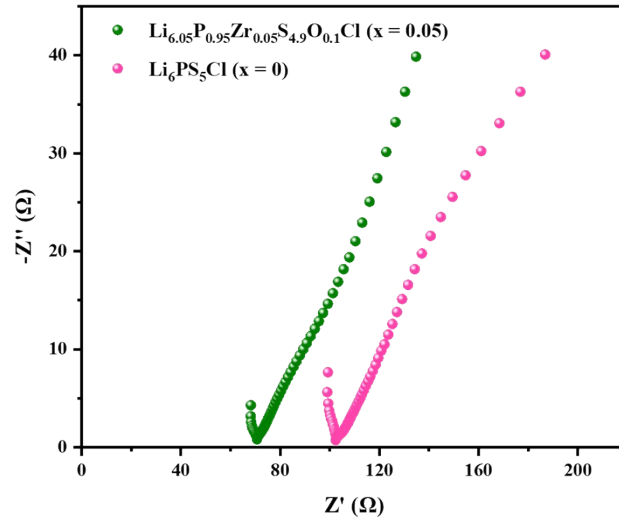

**Fig. S22** Nyquist plots of LiCoO<sub>2</sub>/Li<sub>6.05</sub>P<sub>0.95</sub>Zr<sub>0.05</sub>S<sub>4.9</sub>O<sub>0.1</sub>Cl/Li and LiCoO<sub>2</sub>/Li<sub>6</sub>PS<sub>5</sub>Cl/Li batteries.

**Table S1** Crystallographic data of Li<sub>6</sub>PS<sub>5</sub>Cl obtained from Rietveld refinement.

| Li <sub>6</sub> PS <sub>5</sub> Cl structure from X-ray power diffraction data (space group F-43m);<br>$\lambda_1(\text{Cu-K}\alpha_1) = 1.5406 \text{ \AA}$ ; $\lambda_2(\text{Cu-K}\alpha_2) = 1.5444 \text{ \AA}$<br>$a = 9.848228 \text{ \AA}$ ;<br>$R_{\text{wp}} = 7.31\%$ ; $R_{\text{p}} = 5.68\%$ ; $\chi^2 = 1.604$ |              |        |        |        |        |                                     |
|-------------------------------------------------------------------------------------------------------------------------------------------------------------------------------------------------------------------------------------------------------------------------------------------------------------------------------|--------------|--------|--------|--------|--------|-------------------------------------|
| Atom                                                                                                                                                                                                                                                                                                                          | Wyckoff site | x      | y      | z      | Occ.   | U <sub>iso</sub> [ $\text{\AA}^2$ ] |
| Li1                                                                                                                                                                                                                                                                                                                           | 48h          | 0.3203 | 0.0182 | 0.6798 | 0.5000 | 0.0478                              |
| P1                                                                                                                                                                                                                                                                                                                            | 4b           | 0.0000 | 0.0000 | 0.5000 | 1.0000 | 0.0197                              |

|            |     |        |         |        |        |        |
|------------|-----|--------|---------|--------|--------|--------|
| <b>S1</b>  | 16e | 0.1200 | -0.1200 | 0.6200 | 1.0000 | 0.0328 |
| <b>S2</b>  | 4d  | 0.2500 | 0.2500  | 0.7500 | 0.3850 | 0.0354 |
| <b>S3</b>  | 4a  | 0.0000 | 0.0000  | 1.0000 | 0.6150 | 0.0208 |
| <b>Cl1</b> | 4d  | 0.2500 | 0.2500  | 0.7500 | 0.6150 | 0.0354 |
| <b>Cl2</b> | 4a  | 0.0000 | 0.0000  | 1.0000 | 0.3850 | 0.0208 |

**Table S2** Crystallographic data of  $\text{Li}_{6.05}\text{P}_{0.95}\text{Zr}_{0.05}\text{S}_{4.9}\text{O}_{0.1}\text{Cl}$  obtained from Rietveld refinement.

| <b><math>\text{Li}_{6.05}\text{P}_{0.95}\text{Zr}_{0.05}\text{S}_{4.9}\text{O}_{0.1}\text{Cl}</math> structure from X-ray power diffraction data (space group F-43m);</b> |                     |          |          |          |             |                                                  |
|---------------------------------------------------------------------------------------------------------------------------------------------------------------------------|---------------------|----------|----------|----------|-------------|--------------------------------------------------|
| $\lambda_1(\text{Cu-K}_{\alpha 1}) = 1.5406 \text{ \AA}$ ; $\lambda_2(\text{Cu-K}_{\alpha 2}) = 1.5444 \text{ \AA}$                                                       |                     |          |          |          |             |                                                  |
| $a = 9.851008 \text{ \AA}$ ;                                                                                                                                              |                     |          |          |          |             |                                                  |
| $R_{\text{wp}} = 8.25\%$ ; $R_p = 5.68\%$ ; $\chi^2 = 1.216$                                                                                                              |                     |          |          |          |             |                                                  |
| <b>Atom</b>                                                                                                                                                               | <b>Wyckoff site</b> | <b>x</b> | <b>y</b> | <b>z</b> | <b>Occ.</b> | <b><math>U_{\text{iso}}[\text{\AA}^2]</math></b> |
| <b>Li1</b>                                                                                                                                                                | 48h                 | 0.3201   | 0.0199   | 0.6799   | 0.5150      | 0.0137                                           |
| <b>P1</b>                                                                                                                                                                 | 4b                  | 0.0000   | 0.0000   | 0.5000   | 0.9090      | 0.0244                                           |
| <b>Zr1</b>                                                                                                                                                                | 4b                  | 0.0000   | 0.0000   | 0.5000   | 0.0910      | 0.0244                                           |
| <b>S1</b>                                                                                                                                                                 | 16e                 | 0.1200   | -0.1200  | 0.6200   | 0.9836      | 0.0416                                           |
| <b>O1</b>                                                                                                                                                                 | 16e                 | 0.1200   | -0.1200  | 0.6200   | 0.0164      | 0.0416                                           |
| <b>S2</b>                                                                                                                                                                 | 4d                  | 0.2500   | 0.2500   | 0.7500   | 0.3850      | 0.0263                                           |
| <b>S3</b>                                                                                                                                                                 | 4a                  | 0.0000   | 0.0000   | 1.0000   | 0.6150      | 0.0221                                           |
| <b>Cl1</b>                                                                                                                                                                | 4d                  | 0.2500   | 0.2500   | 0.7500   | 0.6150      | 0.0263                                           |
| <b>Cl2</b>                                                                                                                                                                | 4a                  | 0.0000   | 0.0000   | 1.0000   | 0.3850      | 0.0221                                           |

**Table S3** Crystallographic data (atomic coordinates, occupancy, and Beq) of  $\text{Li}_6\text{PS}_5\text{Cl}$ , obtained from Rietveld refinement of neutron diffraction data.

| <b><math>\text{Li}_6\text{PS}_5\text{Cl}</math> structure from neutron diffraction data (space group F-43m);</b>          |                     |          |          |          |             |            |
|---------------------------------------------------------------------------------------------------------------------------|---------------------|----------|----------|----------|-------------|------------|
| $\lambda_1 = 1.8838 \text{ \AA}$ ;                                                                                        |                     |          |          |          |             |            |
| $a = 9.851711 \text{ \AA}$ ;                                                                                              |                     |          |          |          |             |            |
| <b>Fit residuals (<math>R_{\text{wp}}</math>, <math>R_{\text{exp}}</math>, <math>R_p</math>): 4.786%, 5.211%, 3.718%;</b> |                     |          |          |          |             |            |
| <b>Atom</b>                                                                                                               | <b>Wyckoff site</b> | <b>x</b> | <b>y</b> | <b>z</b> | <b>Occ.</b> | <b>Beq</b> |

|            |     |        |         |        |         |         |
|------------|-----|--------|---------|--------|---------|---------|
| <b>Li1</b> | 48h | 0.3203 | 0.0182  | 0.6798 | 0.50000 | 2.99951 |
| <b>P1</b>  | 4b  | 0.0000 | 0.0000  | 0.5000 | 1.00000 | 0.00000 |
| <b>S1</b>  | 16e | 0.1200 | -0.1200 | 0.6200 | 1.00000 | 0.97127 |
| <b>S2</b>  | 4d  | 0.2500 | 0.2500  | 0.7500 | 0.21789 | 0.01653 |
| <b>S3</b>  | 4a  | 0.0000 | 0.0000  | 1.0000 | 0.58577 | 0.07156 |
| <b>Cl1</b> | 4d  | 0.2500 | 0.2500  | 0.7500 | 0.78211 | 0.00283 |
| <b>Cl2</b> | 4a  | 0.0000 | 0.0000  | 1.0000 | 0.41423 | 0.04195 |

**Table S4** Crystallographic data (atomic coordinates, occupancy, and Beq) of  $\text{Li}_{6.05}\text{P}_{0.95}\text{Zr}_{0.05}\text{S}_{4.9}\text{O}_{0.1}\text{Cl}$ , obtained from Rietveld refinement of neutron diffraction data.

| <b><math>\text{Li}_{6.05}\text{P}_{0.95}\text{Zr}_{0.05}\text{S}_{4.9}\text{O}_{0.1}\text{Cl}</math> structure from neutron diffraction data (space group F-43m);</b> |                     |          |          |          |             |            |
|-----------------------------------------------------------------------------------------------------------------------------------------------------------------------|---------------------|----------|----------|----------|-------------|------------|
| <b><math>\lambda_1 = 1.8838 \text{ \AA}</math>;</b>                                                                                                                   |                     |          |          |          |             |            |
| <b><math>a = 9.854896 \text{ \AA}</math>;</b>                                                                                                                         |                     |          |          |          |             |            |
| <b>Fit residuals (<math>R_{\text{wp}}</math>, <math>R_{\text{exp}}</math>, <math>R_{\text{p}}</math>): 8.727%, 4.166%, 5.801%;</b>                                    |                     |          |          |          |             |            |
| <b>Atom</b>                                                                                                                                                           | <b>Wyckoff site</b> | <b>x</b> | <b>y</b> | <b>z</b> | <b>Occ.</b> | <b>Beq</b> |
| <b>Li1</b>                                                                                                                                                            | 48h                 | 0.3203   | 0.0182   | 0.6798   | 0.50000     | 3.00000    |
| <b>P1</b>                                                                                                                                                             | 4b                  | 0.0000   | 0.0000   | 0.5000   | 0.18997     | 2.36554    |
| <b>S1</b>                                                                                                                                                             | 16e                 | 0.1200   | -0.1200  | 0.6200   | 0.86720     | 3.00000    |
| <b>S2</b>                                                                                                                                                             | 4d                  | 0.2500   | 0.2500   | 0.7500   | 0.04249     | 2.18362    |
| <b>S3</b>                                                                                                                                                             | 4a                  | 0.0000   | 0.0000   | 1.0000   | 0.54228     | 0.00000    |
| <b>Cl1</b>                                                                                                                                                            | 4d                  | 0.2500   | 0.2500   | 0.7500   | 0.95751     | 2.18362    |
| <b>Cl2</b>                                                                                                                                                            | 4a                  | 0.0000   | 0.0000   | 1.0000   | 0.45772     | 0.00000    |
| <b>Zr1</b>                                                                                                                                                            | 4b                  | 0.0000   | 0.0000   | 0.5000   | 0.86720     | 2.36554    |
| <b>O1</b>                                                                                                                                                             | 16e                 | 0.1200   | -0.1200  | 0.6200   | 0.13280     | 3.00000    |

**Table S5** Summary of the sulfide electrolyte-based Li-Li symmetric cell performance.

| Electrolyte                                                                                              | CCD<br>(mA cm <sup>-2</sup> ) | Cycling<br>Current<br>Density<br>(mA cm <sup>-2</sup> ) | Cut-off<br>Capacity<br>(mAh cm <sup>-2</sup> ) | Cycling<br>Time (h) | Operating<br>temperature | Reference        |
|----------------------------------------------------------------------------------------------------------|-------------------------------|---------------------------------------------------------|------------------------------------------------|---------------------|--------------------------|------------------|
|                                                                                                          |                               | <b>0.1</b>                                              | <b>0.1</b>                                     | <b>800</b>          | <b>RT</b>                |                  |
| <b>Li<sub>6.05</sub>P<sub>0.95</sub>Zr<sub>0.05</sub>S<sub>4.9</sub>O<sub>0.1</sub>Cl</b>                | <b>1.7</b>                    | <b>0.5</b>                                              | <b>0.5</b>                                     | <b>400</b>          | <b>RT</b>                | <b>This work</b> |
|                                                                                                          |                               | <b>0.85</b>                                             | <b>0.85</b>                                    | <b>200</b>          | <b>RT</b>                |                  |
| Li <sub>6</sub> PS <sub>4.7</sub> O <sub>0.3</sub> Br                                                    | 0.89                          | 0.1                                                     | -                                              | 560                 | RT                       | 1                |
| Li <sub>5.5</sub> PS <sub>4.425</sub> O <sub>0.075</sub> Cl <sub>1.5</sub>                               | -                             | 0.4                                                     | 0.2                                            | 150                 | RT                       | 2                |
| Li <sub>6.2</sub> P <sub>0.8</sub> Sn <sub>0.2</sub> S <sub>5</sub> I                                    | 1.26                          | 0.1                                                     | 0.1                                            | 700                 | RT                       | 3                |
| Li <sub>6.03</sub> P <sub>0.97</sub> Se <sub>0.03</sub> S <sub>5</sub> Cl                                | 0.6                           | 0.1                                                     | -                                              | 185                 | RT                       | 4                |
| Li <sub>6</sub> P <sub>0.925</sub> Sb <sub>0.075</sub> S <sub>5</sub> Cl                                 | 1.2                           | 0.1                                                     | 0.1                                            | 800                 | RT                       | 5                |
|                                                                                                          |                               | 0.2                                                     | 0.2                                            | 1200                | RT                       |                  |
| Li <sub>5.6</sub> Cu <sub>0.2</sub> PS <sub>4.8</sub> Br <sub>1.2</sub>                                  | 1.2                           | 0.5                                                     | 1                                              | 240                 | RT                       | 6                |
|                                                                                                          |                               | 1                                                       | 3                                              | 120                 | 50°C                     |                  |
|                                                                                                          |                               | 0.1                                                     | 0.1                                            | 600                 | RT                       |                  |
| Li <sub>6.04</sub> P <sub>0.98</sub> Bi <sub>0.02</sub> S <sub>4.97</sub> O <sub>0.03</sub> Cl           | 1.1                           | 1                                                       | 1                                              | 200                 | RT                       | 7                |
| Li <sub>5.6</sub> PS <sub>4.6</sub> Cl <sub>1.0</sub> Br <sub>0.4</sub>                                  | 0.35                          | 0.2                                                     | -                                              | 500                 | RT                       | 8                |
| Li <sub>5.5</sub> P <sub>0.9</sub> Sn <sub>0.1</sub> S <sub>4.2</sub> O <sub>0.2</sub> Cl <sub>1.6</sub> | 1.2                           | 0.5                                                     | 0.5                                            | 200                 | RT                       | 9                |
| Li <sub>5.7</sub> Zn <sub>0.15</sub> PS <sub>4.85</sub> O <sub>0.15</sub> Br                             | 0.78                          | 0.78                                                    | 0.39                                           | 140                 | RT                       | 10               |
|                                                                                                          |                               | 0.2                                                     | -                                              | 300                 | RT                       |                  |
| LPSScO(0.15)-22.5LiS                                                                                     | 0.6                           | 0.3                                                     | -                                              | 200                 | RT                       | 11               |
| Li <sub>7</sub> P <sub>2.88</sub> Nb <sub>0.12</sub> S <sub>10.7</sub> O <sub>0.3</sub>                  | 1.16                          | 0.2                                                     | 0.2                                            | 300                 | RT                       | 12               |
| Li <sub>6.3</sub> P <sub>0.7</sub> Sn <sub>0.3</sub> S <sub>4.4</sub> O <sub>0.6</sub> I                 | 0.75                          | 0.2                                                     | 0.1                                            | 180                 | RT                       | 13               |
| LiFSI@LPS                                                                                                | 0.7                           | 0.3                                                     | 0.6                                            | 360                 | RT                       | 14               |
| Li <sub>7</sub> P <sub>2</sub> S <sub>8</sub> I                                                          | 0.2                           | 0.2                                                     | 0.2                                            | 83                  | RT                       | 15               |

**Table S6** Comparison of physicochemical properties of  $\text{Li}_{6.05}\text{P}_{0.95}\text{Zr}_{0.05}\text{S}_{4.9}\text{O}_{0.1}\text{Cl}$  electrolyte with other representative sulfide electrolytes.

| Sulfide solid electrolyte                                                              | Ionic conductivity (RT, mS $\text{cm}^{-1}$ ) | Electronic conductivity (RT, S $\text{cm}^{-1}$ ) | Air stability | Interface with Li metal | Reference |
|----------------------------------------------------------------------------------------|-----------------------------------------------|---------------------------------------------------|---------------|-------------------------|-----------|
| $\text{Li}_{6.05}\text{P}_{0.95}\text{Zr}_{0.05}\text{S}_{4.9}\text{O}_{0.1}\text{Cl}$ | 3.97                                          | $6.11 \times 10^{-10}$                            | Good          | Good                    | This work |
| $\text{Li}_6\text{PS}_5\text{Br}$                                                      | 2.76                                          | $1.45 \times 10^{-8}$                             | Bad           | Bad                     | 16        |
| $\text{Li}_6\text{PS}_5\text{Cl}$                                                      | 1.46                                          | $8.98 \times 10^{-9}$                             | Bad           | Bad                     | 17        |
| $\text{Li}_3\text{PS}_4$                                                               | 0.389                                         | $1.2 \times 10^{-9}$                              | Bad           | Bad                     | 18        |
| $\text{Li}_7\text{P}_3\text{S}_{11}$                                                   | 0.81                                          | $2.92 \times 10^{-8}$                             | Bad           | Bad                     | 12        |
| $\text{Li}_{10}\text{GeP}_2\text{S}_{12}$                                              | 12                                            | $9 \times 10^{-9}$                                | Bad           | Bad                     | 19        |
| $\text{Li}_2\text{SnS}_3$                                                              | 0.015                                         | -                                                 | Good          | Bad                     | 20        |
| $\text{Li}_4\text{SnS}_4$                                                              | 0.07                                          | -                                                 | Good          | Bad                     | 21        |
| $\text{Li}_6\text{PS}_5\text{Cl}_{0.3}\text{F}_{0.7}$                                  | 0.71                                          | $9.85 \times 10^{-10}$                            | -             | Good                    | 22        |
| $\text{Li}_{6.3}\text{P}_{0.9}\text{Mg}_{0.1}\text{S}_5\text{Cl}_{0.8}\text{F}_{0.2}$  | 1.7                                           | $1.03 \times 10^{-9}$                             | -             | Good                    | 23        |

## References

- Z. X. Zhang, L. Zhang, X. L. Yan, H. Q. Wang, Y. Y. Liu, C. Yu, X. T. Cao, L. van Eijck and B. Wen, *J. Power Sources*, 2019, **410**, 162-170.
- L. F. Peng, S. Q. Chen, C. Yu, C. C. Wei, C. Liao, Z. K. Wu, H. L. Wang, S. J. Cheng and J. Xie, *ACS Appl. Mater. Interfaces*, 2022, **14**, 4179-4185.
- F. P. Zhao, J. W. Liang, C. Yu, Q. Sun, X. N. Li, K. Adair, C. H. Wang, Y. Zhao, S. M. Zhang, W. H. Li, S. X. Deng, R. Y. Li, Y. N. Huang, H. Huang, L. Zhang, S. Q. Zhao, S. G. Lu and X. L. Sun, *Adv. Energy Mater.*, 2020, **10**.
- H. M. Kim, Y. Subramanian and K. S. Ryu, *Electrochim. Acta*, 2023, **442**.
- H. Liu, Q. S. Zhu, Y. H. Liang, C. Wang, D. B. Li, X. X. Zhao, L. Gao and L. Z. Fan, *Chem. Eng. J.*, 2023, **462**.
- Z. Jiang, Y. Liu, H. L. Peng, J. R. Li, X. Xu, H. Su, Y. Zhong, X. L. Wang, C. D. Gu and J. P. Tu,

- Energy Stor. Mater.*, 2023, **56**, 300-309.
7. H. Liu, Q. S. Zhu, C. Wang, G. X. Wang, Y. H. Liang, D. B. Li, L. Gao and L. Z. Fan, *Adv. Funct. Mater.*, 2022, **32**.
  8. Y. Subramanian, R. Rajagopal and K. S. Ryu, *J. Power Sources*, 2022, **520**.
  9. G. Y. Li, S. P. Wu, H. P. Zheng, Y. Yang, J. Y. Cai, H. Zhu, X. Huang, H. Z. Liu and H. N. Duan, *Adv. Funct. Mater.*, 2023, **33**.
  10. T. Chen, L. Zhang, Z. X. Zhang, P. Li, H. Q. Wang, C. Yu, X. L. Yan, L. M. Wang and B. Xu, *ACS Appl. Mater. Interfaces*, 2019, **11**, 40808-40816.
  11. Y. Subramanian, R. Rajagopal, S. Kang, Y. J. Jung and K. S. Ryu, *J Energy Storage*, 2023, **68**.
  12. Z. Jiang, T. B. Liang, Y. Liu, S. Z. Zhang, Z. X. Li, D. H. Wang, X. L. Wang, X. H. Xia, C. D. Gu and J. P. Tu, *ACS Appl. Mater. Interfaces*, 2020, **12**, 54662-54670.
  13. T. Chen, D. W. Zeng, L. Zhang, M. Yang, D. W. Song, X. L. Yan and C. Yu, *J. Energy Chem.*, 2021, **59**, 530-537.
  14. X. L. Fan, X. Ji, F. D. Han, J. Yue, J. Chen, L. Chen, T. Deng, J. J. Jiang and C. S. Wang, *Sci. Adv.*, 2018, **4**.
  15. E. Rangasamy, Z. C. Liu, M. Gobet, K. Pilar, G. Sahu, W. Zhou, H. Wu, S. Greenbaum and C. D. Liang, *J. Am. Chem. Soc.*, 2015, **137**, 1384-1387.
  16. Z. Jiang, C. Yu, S. Chen, C. Wei, C. Liao, Z. Wu, S. Chen, S. Cheng and J. Xie, *Scr. Mater.*, 2023, **227**, 115303.
  17. B. W. Taklu, Y. Nikodimos, H. K. Bezabh, K. Lakshmanan, T. M. Hagos, T. A. Nigatu, S. K. Merso, H. Y. Sung, S. C. Yang, W. N. Su and B. J. Hwang, *Nano Energy*, 2023, **112**.
  18. Y. Ni, C. Huang, H. Liu, Y. H. Liang and L. Z. Fan, *Adv. Funct. Mater.*, 2022, **32**.
  19. N. Kamaya, K. Homma, Y. Yamakawa, M. Hirayama, R. Kanno, M. Yonemura, T. Kamiyama, Y. Kato, S. Hama, K. Kawamoto and A. Mitsui, *Nat. Mater.*, 2011, **10**, 682-686.
  20. J. A. Brant, D. M. Massi, N. A. W. Holzwarth, J. H. MacNeil, A. P. Douvalis, T. Bakas, S. W. Martin, M. D. Gross and J. A. Aitken, *Chem. Mater.*, 2015, **27**, 189-196.
  21. T. Kaib, S. Haddadpour, M. Kapitein, P. Bron, C. Schröder, H. Eckert, B. Roling and S. Dehnen, *Chem. Mater.*, 2012, **24**, 2211-2219.
  22. F. P. Zhao, Q. Sun, C. Yu, S. M. Zhang, K. Adair, S. Z. Wang, Y. L. Liu, Y. Zhao, J. W. Liang, C. H. Wang, X. N. Li, X. Li, W. Xia, R. Y. Li, H. Huang, L. Zhang, S. Q. Zhao, S. G. Lu and

X. L. Sun, *ACS Energy Lett.*, 2020, **5**, 1035-1043.

23. C. Liu, B. T. Chen, T. R. Zhang, J. C. Zhang, R. Y. Wang, J. Zheng, Q. J. Mao and X. F. Liu, *Angew. Chem. Int. Ed.*, 2023, DOI: 10.1002/anie.202302655.
